# Supplementary material for: Efficient photocatalytic synthesis of H 2 O 2 coupled with 3,4-dihydroisoquinoline by rGO-modified CdS catalysts
Source: Royal Society of Chemistry journal article supplement (doi:10.1039/d5cc05213k), 2026-01-01
Supplement: d5cc05213k1.pdf [file d5cc05213k1.pdf]

## Supplementary Information

### Efficient photocatalytic synthesis of H<sub>2</sub>O<sub>2</sub> coupled with 3,4-dihydroisoquinoline by rGO-modified CdS catalysts

Hui-Li Wu<sup>a</sup>, Ting-Ting Wang<sup>a</sup>, Chang-Long Tan<sup>\*b</sup>, Ming-Yu Qi<sup>c</sup>, Yi-Jun Xu,<sup>a,b</sup> and Zi-Rong Tang<sup>\*a,c</sup>

<sup>a</sup> College of Chemistry, State Key Laboratory of Photocatalysis on Energy and Environment, Fuzhou University, Fuzhou 350116, P. R. China

<sup>b</sup> Institute of Fundamental and Frontier Sciences, University of Electronic Science and Technology of China, Chengdu 611731, P. R. China

<sup>c</sup> School of Materials and Energy, University of Electronic Science and Technology of China, Chengdu 611731, P. R. China

\* Corresponding authors.

E-mail addresses: cl\_tan@uestc.edu.cn (Chang-Long Tan); zrtang@uestc.edu.cn (Zi-Rong Tang).

## Table of Contents

### Experimental section

**Fig. S1.** X-ray diffraction (XRD) patterns of CdS and rGO-CdS composites with different rGO mass ratios (denoted as x% rGO-CdS, x = 5, 10 or 15, respectively).

**Fig. S2.** Gas chromatography-mass (GC-MS) chromatogram of DHIQ and THIQ.

**Fig. S3.** Mass spectrogram of (a) DHIQ and (b) THIQ.

**Fig. S4.** (a) UV-vis absorption spectrum of H<sub>2</sub>O<sub>2</sub> standard solutions. (b) Calibration curve for H<sub>2</sub>O<sub>2</sub> at 350 nm.

**Fig. S5.** Gas chromatography-mass spectroscopy (GC-MS) chromatogram of THIQ and DHIQ with different reaction times.

**Fig. S6.** Time-dependent conversion of THIQ.

**Fig. S7.** Photocatalytic performance with consecutive THIQ addition.

**Fig. S8.** The scanning electron microscopy (SEM) image of the used 10% rGO-CdS.

**Fig. S9.** XRD patterns of the fresh and used 10% rGO-CdS.

**Fig. S10.** UV-vis diffuse reflectance spectroscopy (DRS) of the fresh and used 10% rGO-CdS.

**Fig. S11.** Control experiments for photocatalytic activity test.

**Fig. S12.** Tauc plots for optical band gap of CdS.

**Fig. S13.** Mott-Schottky plots of CdS.

**Fig. S14.** Schematic diagram of the energy band structures for 10% rGO-CdS.

**Fig. S15.** Time-dependent in situ diffuse reflectance infrared Fourier transform spectroscopy (DRIFTS) spectra of 10% rGO-CdS in THIQ/CH<sub>3</sub>CN solution under illumination in the wavelength range of 800–1400 cm<sup>-1</sup>.

**Fig. S16.** Equations for five possible pathways of co-production of DHIQ and H<sub>2</sub>O<sub>2</sub>.

**Table S1.** Photocatalytic systems for O<sub>2</sub> reduction to H<sub>2</sub>O<sub>2</sub>.

**Table S2.** Photocatalytic systems for DHIQ synthesis.

**Table S3.** Photocatalytic systems for co-production of H<sub>2</sub>O<sub>2</sub> and organic products.

### References

## Experimental section

**Chemicals and materials.** Potassium permanganate ( $\text{KMnO}_4$ ), sulfuric acid ( $\text{H}_2\text{SO}_4$ ), hydrochloric acid ( $\text{HCl}$ ), acetone ( $\text{C}_3\text{H}_6\text{O}$ ), hydrogen peroxide 30% ( $\text{H}_2\text{O}_2$ ), acetonitrile ( $\text{CH}_3\text{CN}$ ), ethanol ( $\text{C}_2\text{H}_5\text{OH}$ ), dimethyl sulfoxide ( $\text{C}_2\text{H}_6\text{OS}$ , DMSO), isopropanol ( $\text{C}_3\text{H}_8\text{O}$ ), carbon tetrachloride ( $\text{CCl}_4$ ), diammonium oxalate monohydrate  $[(\text{NH}_4)_2\text{C}_2\text{O}_4 \cdot \text{H}_2\text{O}]$  and 5, 5-dimethyl-1-pyrroline-N-oxide (DMPO) were supplied by Sinopharm Chemical Reagent Co., Ltd (Shanghai, China). Cadmium acetate dihydrate  $[\text{Cd}(\text{CH}_3\text{COO})_2 \cdot 2\text{H}_2\text{O}]$ , p-benzoquinone, L-tryptophan and 3,4-dihydroisoquinoline ( $\text{C}_9\text{H}_9\text{N}$ , DHIQ) were procured from Aladdin Biochemical Technology Co., Ltd (Shanghai, China). Graphite powder was supplied by Zhongtian Co., Ltd. (Qingdao, China). 1,2,3,4-tetrahydroisoquinoline ( $\text{C}_9\text{H}_{11}\text{N}$ , THIQ) was bought from Bide Pharmatech Co., Ltd (Shanghai, China). Deionized (DI) water was obtained locally.

**Synthesis of Graphene oxide (GO).** The rGO nanosheets were prepared according to previously reported method.<sup>51</sup> Specifically, 10 g graphite powder was suspended in 230 mL concentrated  $\text{H}_2\text{SO}_4$  under moderate agitation. Subsequently, 30 g  $\text{KMnO}_4$  was added incrementally while maintaining the temperature below  $5^\circ\text{C}$  via an ice bath. The mixture was then heated to  $35^\circ\text{C}$  in a water bath and stirred for 2 h. After that, the resulting mixture was diluted with 500 mL DI water in an ice bath to maintain the temperature below  $5^\circ\text{C}$ . After further dilution with 1.5 L DI water, 80 mL 30%  $\text{H}_2\text{O}_2$  was added to the mixture. The precipitate was isolated via centrifugation and rinsed with a 1:10  $\text{HCl}$  aqueous solution to remove metal ions, followed by repeated DI water rinses until neutral pH was achieved. The washed material was then dialyzed for one week, and the final GO sample was obtained after thorough sonication. Before use, the GO solution should be put in a freeze dryer for 48 h to make it become fluffy GO solid.

**Synthesis of x% rGO-CdS composites.** A series of rGO-CdS composites with different GO weight percentages (x% rGO-CdS, x = 5, 10 or 15) were synthesized by a simple solvothermal method, during which GO not only served as a support but was also reduced to rGO.<sup>52</sup> Briefly, specific amounts of GO powders were uniformly dispersed in 60 mL DMSO, and the mixture was then by ultrasonication for 30 min to form a stable dark brown suspension. Subsequently, 0.3998 g of  $\text{Cd}(\text{CH}_3\text{COO})_2 \cdot 2\text{H}_2\text{O}$ , acting as the cadmium source, was added to the above GO dispersion, with ultrasonication continued for another 30 min to enhance homogeneity. The resulting mixture was then transferred into a Teflon-lined stainless-steel autoclave and heated at  $180^\circ\text{C}$  for 12 h in an oven. Herein, DMSO functioned as both the solvent and the sulfur source as well as reducing agent to convert GO to rGO. After the reaction, the system was naturally cooled to room temperature, and the solid product was collected by high-speed centrifugation (13,000 rpm, 10 min). It was then repeatedly washed with anhydrous ethanol and centrifuged to thoroughly remove residual impurities, yielding green solid rGO-CdS. The washed rGO-CdS was dried overnight in a vacuum oven at  $60^\circ\text{C}$ . Pristine CdS nanoparticles (NPs) were synthesized using identical procedures and conditions except for the omission of GO.

**Photocatalytic Tests.** The photocatalytic conversion of THIQ to DHIQ coupled with  $\text{H}_2\text{O}_2$  generation was conducted in a sealed quartz reactor, which was maintained at  $20^\circ\text{C}$  via a condenser water system. Specifically, 10 mg photocatalyst and 0.2 mmol THIQ were added to 10 mL  $\text{CH}_3\text{CN}$ , and the resulting suspension was ultrasonically dispersed for 10 min. Then, a 300 W Xe lamp (PLS-SXE 300D,

Beijing Perfectlight Co., Ltd.) with a light density of 0.43 W cm<sup>-2</sup> was used for irradiation ( $\lambda > 400$  nm, 30 min, under ambient air). The light power density was measured by a photoradiometer (PL-MW2000, Beijing Perfectlight Co., Ltd.). A magnetic stirrer was used during the reaction to maintain a uniform dispersion of the solution. After the reaction, the solution was filtered through an organic phase nylon syringe filter (0.22  $\mu$ m) to obtain a clear reaction solution. The organic product was analyzed by gas chromatography-mass spectroscopy (Shimadzu GC-MS QP 2020, Q-Exactive). The selectivity of DHIQ and conversion of THIQ were calculated according to the following equation:

$$\text{Selectivity}(\%) = \frac{n_{\text{DHIQ}}}{n_0 - n_{\text{THIQ}}} \times 100\%$$

$$\text{Conversion}(\%) = \frac{n_0 - n_{\text{THIQ}}}{n_0} \times 100\%$$

Where  $n_0$  means the amount of THIQ that involved in the system initially;  $n_{\text{THIQ}}$  and  $n_{\text{DHIQ}}$  respectively indicate the amounts of THIQ residual and the produced DHIQ after reaction.

The concentration of H<sub>2</sub>O<sub>2</sub> was determined by the iodimetry method combined with UV-vis spectroscopy (Thermo Fisher Scientific Genesys 10S UV-vis).<sup>S3</sup> 1 mL of 0.4 mol L<sup>-1</sup> potassium iodide solution was mixed with 1 mL of 0.1 mol L<sup>-1</sup> potassium hydrogen phthalate solution. Subsequently, the reaction supernatant separated by centrifugation was added into the resulting mixture. The mixed solution was allowed to stand for more than 30 minutes to ensure that H<sub>2</sub>O<sub>2</sub> could fully react with I<sup>-</sup> under acidic conditions to generate I<sub>3</sub><sup>-</sup>.

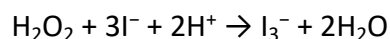

The concentration of I<sub>3</sub><sup>-</sup> was quantified via UV-vis spectroscopy by detecting the absorbance at 350 nm, and the total amount of H<sub>2</sub>O<sub>2</sub> generated throughout the reaction was thereby calculated. The calibration curves were shown in **Fig. S4**. Before the detection, it has been verified that the reaction components (THIQ, DHIQ, and acetonitrile) exhibit negligible absorbance in UV-Vis spectroscopy measurements and thus do not interfere with the quantification of H<sub>2</sub>O<sub>2</sub>.

**Recycling tests.** The photocatalytic recycling tests of 10% rGO-CdS were performed as follows. After the first photocatalytic reaction was completed, the catalyst was collected by centrifugation and rinsed three times with acetonitrile. Subsequently, the photocatalyst was dried under a N<sub>2</sub> purge and used for the second recycling test. All subsequent recycling tests were conducted in the same manner. (Reaction conditions: 0.2 mmol THIQ, 10 mL CH<sub>3</sub>CN,  $\lambda > 400$  nm, 30 min, under ambient air)

**Characterization methods.** The morphology and elemental distribution of the samples were analyzed by scanning electron microscopy (SEM) on a FEI Nova NANO-SEM 230 spectrophotometer, transmission electron microscopy (TEM), high-resolution TEM (HRTEM) and elemental mapping analysis using a JEOL 2100F instrument at an accelerating voltage of 200 kV. X-ray photoelectron

spectroscopy (XPS) measurements were performed using a Thermo Scientific ESCA Lab 250 spectrometer. In XPS analysis, all the binding energies were calibrated by the C 1s peak at 284.6 eV. The crystal phases of the samples were investigated by X-ray diffraction (XRD) on a Rigaku Miniflex diffractometer with Cu K $\alpha$  radiation at 40 kV and 40 mA in the 2 $\theta$  range from 10° to 80°. The optical properties of samples were characterized by ultraviolet-visible (UV-vis) diffuse reflectance spectroscopy (DRS) on an UV-vis spectrophotometer (Thermo Scientific Eolution 200 Series), in which BaSO<sub>4</sub> was employed as the internal reflectance standard. Electron paramagnetic resonance (EPR) spectroscopic measurements were performed at room temperature using a Bruker A300 EPR spectrometer. For in situ EPR measurements, 10 mg sample powders were dispersed in a mixed solution of 10 mL CH<sub>3</sub>CN containing 0.2 mmol THIQ and 0.1 mmol 5,5-dimethyl-1-pyrroline N-oxide (DMPO), which was used as a spin-trapping agent, by ultrasonic treatment. Then, the suspension was injected into a glass capillary and placed in a sealed glass tube under an argon (Ar) atmosphere. The sealed glass tube was placed in the microwave cavity of EPR spectrometer and was irradiated with 300 W Xe lamp ( $\lambda > 400$  nm) during EPR measurements at room temperature. The diffuse reflectance infrared Fourier transform spectroscopy (DRIFTS) was performed on a Thermo Scientific Nicolet iS 50 FT-IR spectrometer. For in situ FTIR measurement, 20 mg of sample powders were placed onto KBr and 200  $\mu$ L anhydrous THIQ was added. The reaction system was purged with Ar for 10 min and irradiated with a 300 W Xe lamp.

**Photoelectrochemical measurements.** The electrochemical and photoelectrochemical measurements were conducted on an electrochemical work station (MUTI AUTOLAB M204) with a conventional three-electrode cell, which used a Pt plate as the counter electrode and an Ag/AgCl electrode as the reference electrode. The working electrode was prepared on fluorine doped tin oxide (FTO) glass that was cleaned by sonication in ethanol for 30 min and dried at 60 °C. Typically, 5 mg of sample was fully dispersed in a mixture of 1 mL N,N-dimethylformamide (DMF) and 50  $\mu$ L Nafion solution by ultrasonic treatment. The 15  $\mu$ L slurry was spread onto the exposed area (0.25 cm<sup>2</sup>) of the pre-treated FTO glass, whose boundary was protected using scotch tape. After drying at 60 °C for 5 h, the scotch tape was unstuck, and the uncoated part of the electrode was isolated with epoxy resin. The transient photocurrent measurement was conducted in a 0.2 M Na<sub>2</sub>SO<sub>4</sub> aqueous solution without an applied voltage bias under the UV-vis light irradiation. Additionally, the cyclic voltammetry (CV) curves and linear sweep voltammetry (LSV) tests were measured in a 0.2 M Na<sub>2</sub>SO<sub>4</sub> aqueous solution (pH = 7). The electrochemical impedance spectroscopy (EIS) measurement was carried out in a 0.5 M KCl solution including 0.01 M K<sub>3</sub>[Fe(CN)<sub>6</sub>]/K<sub>4</sub>[Fe(CN)<sub>6</sub>]. Mott-Schottky plots were obtained at frequencies of 500, 1000 and 1500 Hz with a bias potential ranging from -1 to 2 V vs. Ag/AgCl.

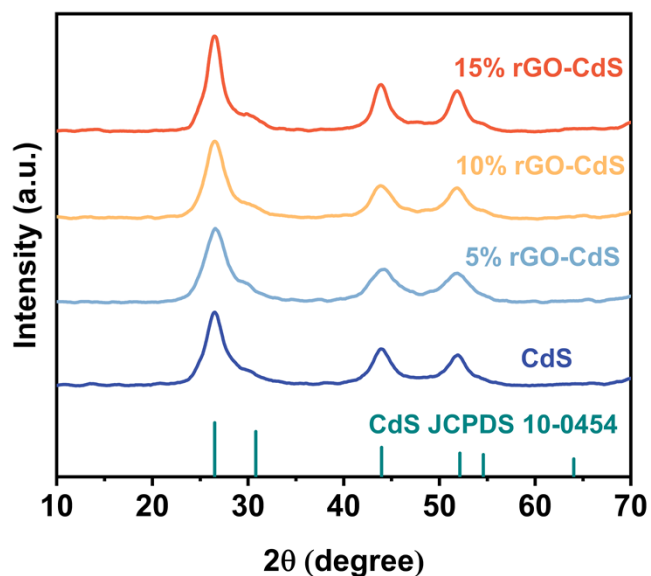

**Fig. S1.** X-ray diffraction (XRD) patterns of CdS and rGO-CdS composites with different rGO mass ratios (denoted as x% rGO-CdS, x = 5, 10 or 15, respectively).

Note: In the XRD pattern of the rGO-CdS composites, the characteristic diffraction peaks can be exclusively indexed to the hexagonal phase of CdS (JCPDS No. 10-0454). No distinct diffraction peak for rGO is observed, which is a common phenomenon reported in the literature for well-exfoliated and thinly coated rGO on semiconductor substrates.<sup>S1</sup> This absence can be attributed to the reason that the relatively low amount and high dispersion of rGO in the composite, which falls below the detection limit of XRD.

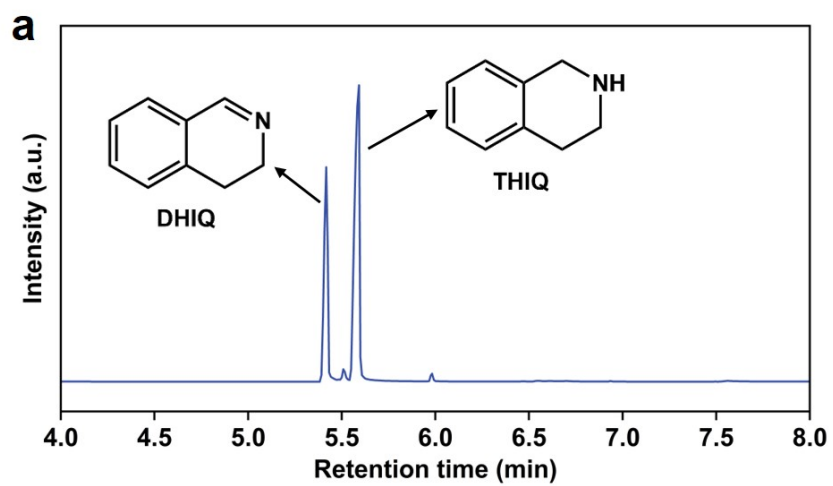

**Fig. S2.** Gas chromatography-mass spectrometry (GC-MS) chromatogram of DHIQ and THIQ.

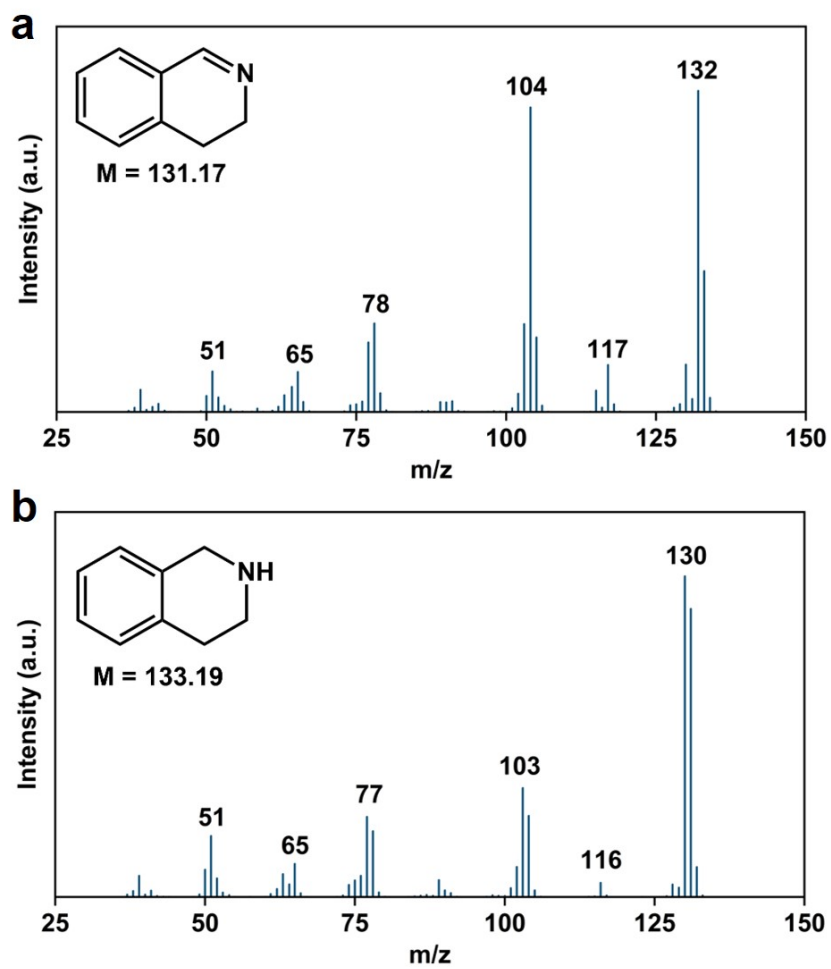

**Fig. S3.** Mass spectrogram of (a) DHIQ and (b) THIQ.



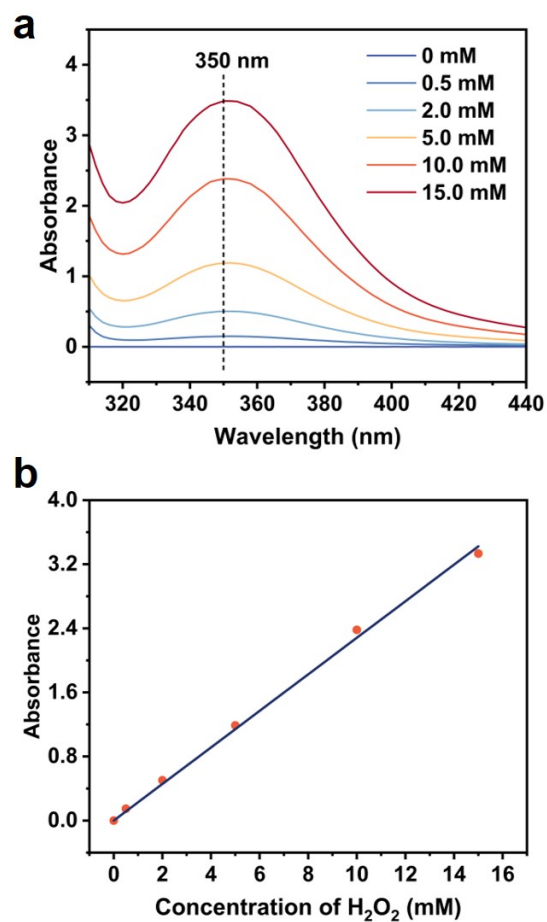

**Fig. S4.** (a) UV-vis absorption spectrum of  $\text{H}_2\text{O}_2$  standard solutions. (b) Calibration curve for  $\text{H}_2\text{O}_2$  at 350 nm.

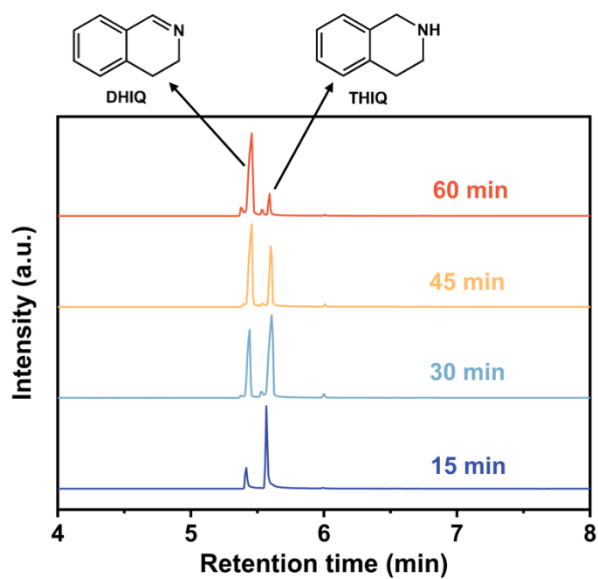

**Fig. S5.** Gas chromatography-mass spectroscopy (GC-MS) chromatogram of THIQ and DHIQ with different reaction times.

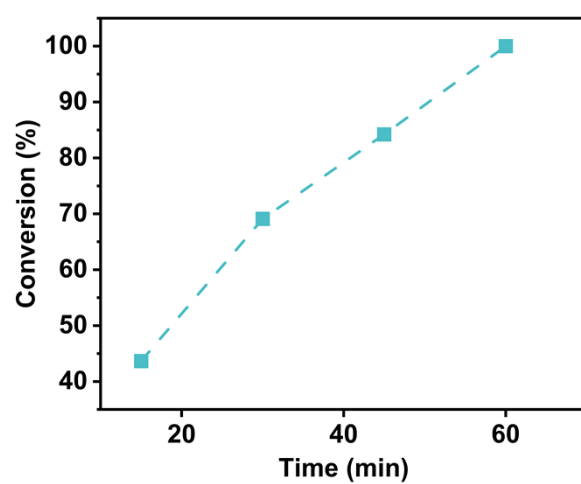

**Fig. S6.** Time-dependent conversion of THIQ.

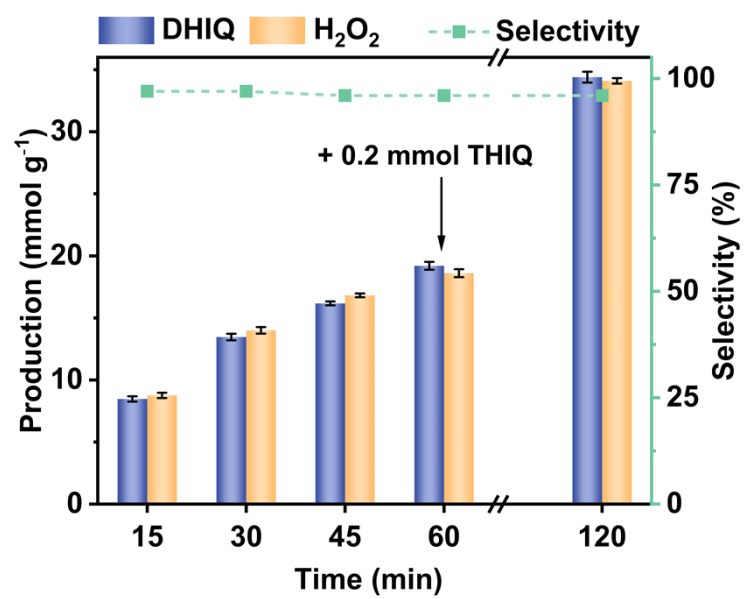

**Fig. S7.** Photocatalytic performance with consecutive THIQ addition.

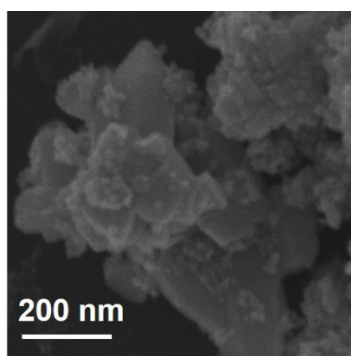

**Fig. S8.** The scanning electron microscopy (SEM) image of the used 10% rGO-CdS.

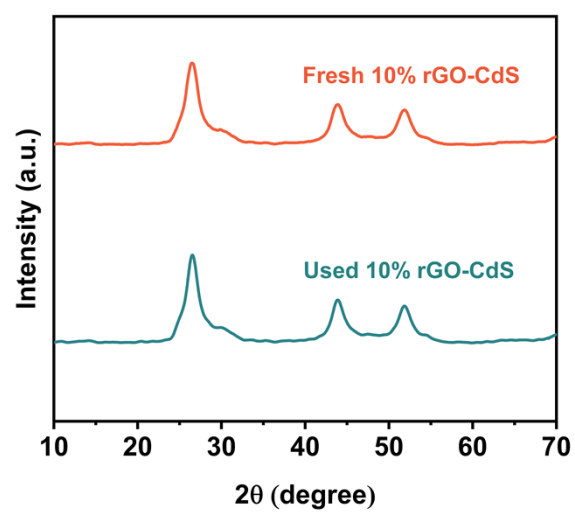

**Fig. S9.** XRD patterns of the fresh and used 10% rGO-CdS.

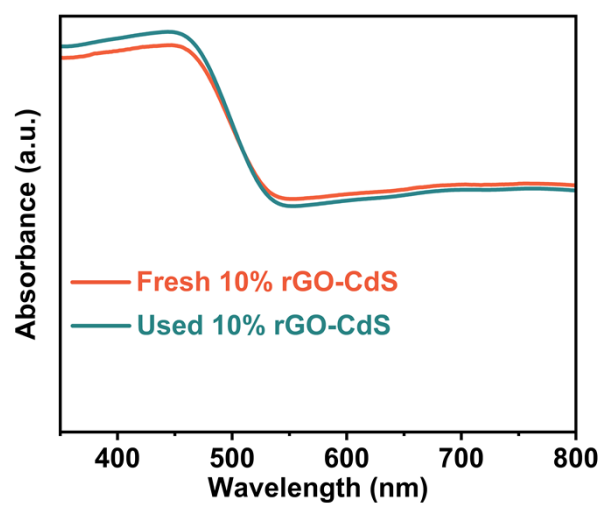

**Fig. S10.** UV-vis diffuse reflectance spectroscopy (DRS) of the fresh and used 10% rGO-CdS.

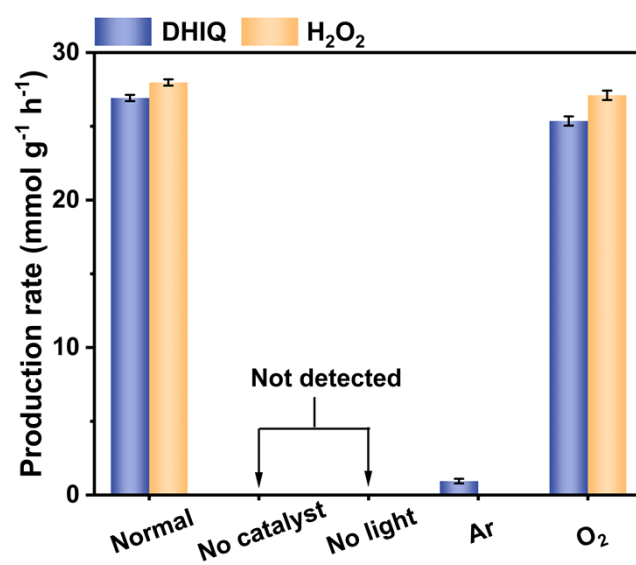

**Fig. S11.** Control experiments for photocatalytic activity test.



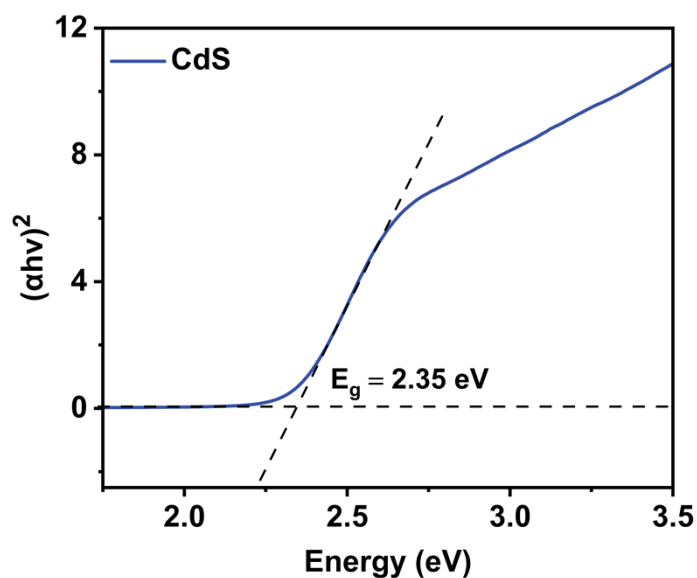

**Fig. S12.** Tauc plots for optical band gap of CdS.

Note: The band gap energy of CdS and 10% rGO-CdS can be calculated by the transformed Kubelka-Munk function:

$$(\alpha h\nu)^n = K \times (h\nu - E_g)$$

where  $\alpha$  is the absorption coefficient,  $h\nu$  is the photon energy,  $K$  is a constant,  $E_g$  is the band gap energy and  $n = 2$ . In **Fig. S12**, the  $E_g$  of pristine CdS is calculated to be 2.35 eV based on the Tauc plots obtained from the transformed Kubelka-Munk function.<sup>S4</sup>

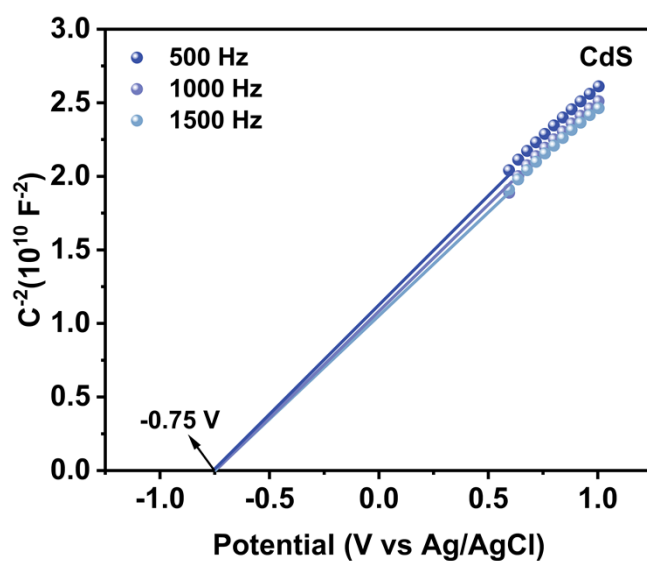

**Fig. S13.** Mott-Schottky plots of CdS.

Note: The flat band potential ( $E_{fb}$ ) of CdS, as calculated from the horizontal axis intercept of the linear region, is  $-0.75$  V vs. Ag/AgCl. The Fermi level ( $E_F$ ) and  $E_{fb}$  of semiconductors are equal at the equilibrium state. According to the equation between the normal hydrogen electrode (NHE) and Ag/AgCl ( $E_{NHE} = E_{Ag/AgCl} + 0.20$  V), the conduction band (CB) position of CdS is calculated as  $-0.55$  V vs. NHE. On this basis, the valence band (VB) position of CdS is further derived as  $+1.80$  V vs. NHE using the equation  $E_{VB} = E_{CB} + E_g$ .<sup>S2</sup>

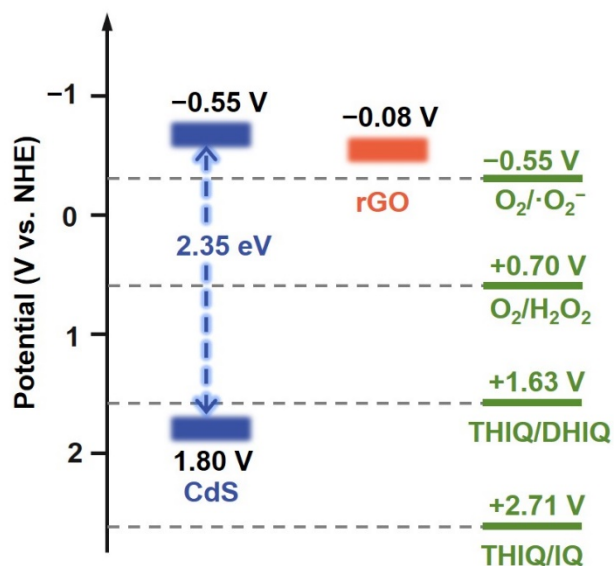

**Fig. S14.** Schematic diagram of the energy band structures for 10% rGO-CdS.

Note: The band structure diagram in **Fig. S14** reveals that the CB potential of CdS is sufficiently negative to reduce  $\text{O}_2$  into superoxide radicals ( $\cdot\text{O}_2^-$ , with  $E(\text{O}_2/\cdot\text{O}_2^-) = -0.33$  V vs. NHE), while its VB potential (+1.80 V vs. NHE) can oxidize THIQ to produce DHIQ ( $E_{(\text{THIQ}/\text{DHIQ})} = +1.63$  V vs. NHE).<sup>S5</sup> Meanwhile, the VB of CdS is insufficient to oxidize THIQ to IQ ( $E_{(\text{THIQ}/\text{IQ})} = +2.71$  V vs. NHE), blocking the secondary dehydrogenation and favoring DHIQ as the major product.<sup>S6</sup>

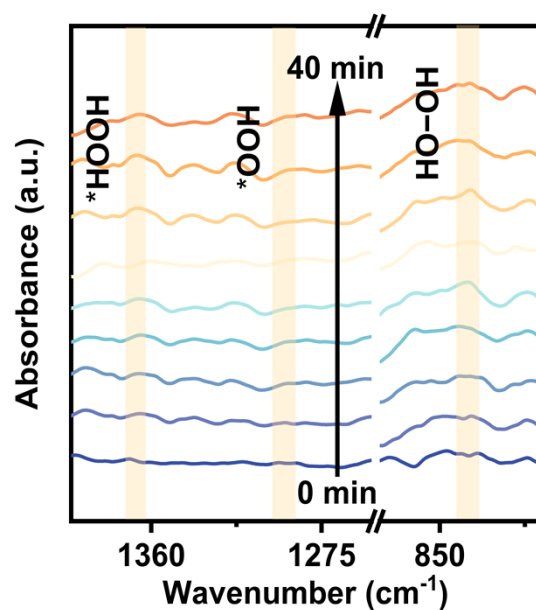

**Fig. S15.** Time-dependent in situ diffuse reflectance infrared Fourier transform spectroscopy (DRIFTS) spectra of 10% rGO-CdS in THIQ/CH<sub>3</sub>CN solution under illumination in the wavelength range of 800–1400 cm<sup>-1</sup>.

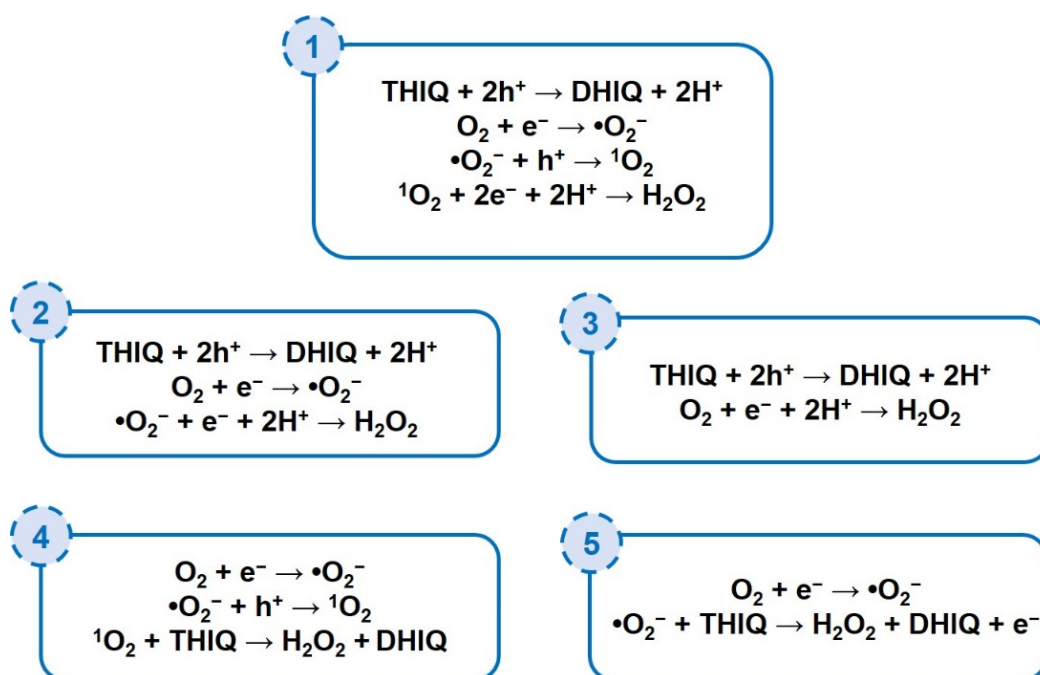

**Fig. S16.** Equations for five possible pathways of co-production of DHIQ and  $\text{H}_2\text{O}_2$ .<sup>S5</sup>

**Table S1.** Photocatalytic systems for O<sub>2</sub> reduction to H<sub>2</sub>O<sub>2</sub>.

| Entry | Catalyst                                             | Atmosphere     | Light source                  | H <sub>2</sub> O <sub>2</sub> production rate<br>(mmol·g <sup>-1</sup> ·h <sup>-1</sup> ) | Ref.      |
|-------|------------------------------------------------------|----------------|-------------------------------|-------------------------------------------------------------------------------------------|-----------|
| 1     | rGO-CdS                                              | Air            | $\lambda > 400$ nm            | 27.98                                                                                     | This work |
| 2     | ZnO-300                                              | O <sub>2</sub> | $\lambda \geq 360$ nm         | 2.79                                                                                      | S7        |
| 3     | P-mMCNNS-25                                          | O <sub>2</sub> | AM1.5G simulated sunlight     | 1.08                                                                                      | S8        |
| 4     | TiO <sub>2</sub> /In <sub>2</sub> S <sub>3</sub> -10 | O <sub>2</sub> | Hg lamp                       | 0.75                                                                                      | S9        |
| 5     | TiO <sub>2</sub> /MoS <sub>x</sub> -Au               | O <sub>2</sub> | Xe lamp                       | 30.44                                                                                     | S10       |
| 6     | Au <sub>0.5</sub> /WO <sub>3</sub>                   | O <sub>2</sub> | $\lambda \geq 420$ nm         | 0.109                                                                                     | S11       |
| 7     | OCN-500                                              | O <sub>2</sub> | $\lambda \geq 420$ nm         | 2.92                                                                                      | S12       |
| 8     | NDCN                                                 | O <sub>2</sub> | $\lambda \geq 420$ nm         | 0.048                                                                                     | S13       |
| 9     | m-CNNP                                               | Air            | 400–700 nm                    | 0.043                                                                                     | S14       |
| 10    | Cu(I)-SA/WO <sub>3</sub>                             | O <sub>2</sub> | Xe lamp<br>$\lambda > 420$ nm | 2.04                                                                                      | S15       |

**Table S2.** Photocatalytic systems for DHIQ synthesis.

| Entry | Catalyst                                           | Atmosphere     | Solvent                                   | Light source       | DHIQ production rate ( $\text{mmol}\cdot\text{g}^{-1}\cdot\text{h}^{-1}$ ) | Ref.      |
|-------|----------------------------------------------------|----------------|-------------------------------------------|--------------------|----------------------------------------------------------------------------|-----------|
| 1     | rGO-CdS                                            | Air            | CH <sub>3</sub> CN                        | $\lambda > 400$ nm | 26.32                                                                      | This work |
| 2     | MoS <sub>2</sub> /ZnIn <sub>2</sub> S <sub>4</sub> | N <sub>2</sub> | CH <sub>3</sub> CN/H <sub>2</sub> O (3:1) | $\lambda > 420$ nm | 0.72                                                                       | S16       |
| 3     | Pd/CdS                                             | Ar             | CH <sub>3</sub> CN                        | $\lambda > 420$ nm | 0.17                                                                       | S17       |
| 4     | ZIS-EG                                             | Air            | Dimethylformamide                         | 455 nm LED lamp    | 1.40                                                                       | S18       |
| 5     | triphenylamine-PDI                                 | Air            | CH <sub>3</sub> CN                        | 420 nm LED lamp    | 1.68                                                                       | S19       |
| 6     | TAPP-An                                            | O <sub>2</sub> | CH <sub>3</sub> CN                        | Xe lamp            | 1.10                                                                       | S20       |

**Table S3.** Photocatalytic systems for co-production of H<sub>2</sub>O<sub>2</sub> and organic products.

| Entry | Catalyst                                                           | Atmosphere     | Reagent (mmol)        | Light source              | H <sub>2</sub> O <sub>2</sub> production rate (mmol·g <sup>-1</sup> ·h <sup>-1</sup> ) | Organic synthesis rate (mmol·g <sup>-1</sup> ·h <sup>-1</sup> ) | Ref.      |
|-------|--------------------------------------------------------------------|----------------|-----------------------|---------------------------|----------------------------------------------------------------------------------------|-----------------------------------------------------------------|-----------|
| 1     | rGO-CdS                                                            | Air            | THIQ 0.2              | λ > 400 nm                | 27.98                                                                                  | DHIQ 26.32                                                      | This work |
| 2     | Zn <sub>3</sub> In <sub>2</sub> S <sub>6</sub>                     | O <sub>2</sub> | THIQ 0.125            | λ ≥ 400 nm                | 66.4                                                                                   | DHIQ 62.10                                                      | S5        |
| 3     | COF-Py-S                                                           | O <sub>2</sub> | THIQ 0.65             | λ > 400 nm                | 19.00                                                                                  | DHIQ 16.25                                                      | S21       |
| 4     | ZrS <sub>1-y</sub> S <sub>2-x</sub> (15/100)                       | O <sub>2</sub> | Benzylamine 0.1       | AM1.5G simulated sunlight | 1.56                                                                                   | Benzonitrile 0.64                                               | S22       |
| 5     | Fe <sub>3</sub> O <sub>4</sub> @CdS@C QDs                          | O <sub>2</sub> | Pure benzyl alcohol   | λ > 300 nm                | 27.10                                                                                  | Benzaldehyde 57.2                                               | S23       |
| 6     | Ag@T-C <sub>3</sub> N <sub>4</sub>                                 | O <sub>2</sub> | Benzyl alcohol 119.9  | Xe lamp, 420–780 nm       | 4.73                                                                                   | Benzaldehyde 19.71                                              | S24       |
| 7     | OPA/Fe-Zr-MOF                                                      | O <sub>2</sub> | Benzyl alcohol 48.1   | λ > 420 nm                | 5.24                                                                                   | Benzaldehyde 5.83                                               | S25       |
| 8     | Ti <sub>2</sub> O <sub>3</sub> /Bi <sub>2</sub> O <sub>3</sub> -40 | O <sub>2</sub> | Furfuryl alcohol 0.29 | Xe lamp, 350–780 nm       | 2.88                                                                                   | Furoic acid 1.12                                                | S26       |
| 9     | DCM-HCPs                                                           | Air            | Bezylamine 0.2        | 455 nm LED lamp           | 5.71                                                                                   | N-Benzylidenebenzylamine 13.3                                   | S27       |
| 10    | JUC-675                                                            | O <sub>2</sub> | Bezylamine 0.1        | Xe lamp λ > 420 nm        | 22.80                                                                                  | N-Benzylidenebenzylamine 9.6                                    | S3        |
| 11    | Pd(0.05)                                                           | O <sub>2</sub> | Benzyl alcohol        | 470 nm                    | 0.006                                                                                  | Benzaldehyde                                                    | S28       |



|    | /BMO-SOVs                       |                | 0.1                    | LED lamp                      |      | 0.82                          |     |
|----|---------------------------------|----------------|------------------------|-------------------------------|------|-------------------------------|-----|
| 12 | TiO <sub>2</sub>                | O <sub>2</sub> | Benzyl alcohol<br>1.75 | Hg lamp $\lambda$<br>> 280 nm | 0.33 | Aldehyde or<br>Ketone<br>0.33 | S29 |
| 13 | g-C <sub>3</sub> N <sub>4</sub> | O <sub>2</sub> | Ethanol<br>77.1        | $\lambda$ > 420<br>nm         | 0.12 | Aldehyde<br>0.13              | S30 |

---

## References

- S1 K.-Q. Lu, Y.-H. Li, F. Zhang, M.-Y. Qi, X. Chen, Z.-R. Tang, Y. M. A. Yamada, M. Anpo, M. Conte and Y.-J. Xu, *Nat. Commun.*, 2020, **11**, 5181.
- S2 M.-H. Sun, M.-Y. Qi, Z.-R. Tang and Y.-J. Xu, *App. Catal. B: Environ.*, 2023, **321**, 122019.
- S3 J. Liu, C. Tuo, W.-Y. Xiao, M.-Y. Qi, Y. Yusran, Z. Wang, H. Li, C. Guo, J. Song, S. Qiu, Y.-J. Xu and Q. Fang, *Angew. Chem. Int. Ed.*, 2025, **64**, e202416240.
- S4 X.-N. Shao, Y.-F. Wang, M.-Y. Qi and Z.-R. Tang, *Mol. Catal.*, 2024, **557**, 113991.
- S5 J. Luo, X. Wei, Y. Qiao, C. Wu, L. Li, L. Chen and J. Shi, *Adv. Mater.*, 2023, **35**, 2210110.
- S6 L. Chen and J. Shi, *Sci. China Mater.*, 2022, **65**, 1-9.
- S7 Y. Zhang, Y. Xia, L. Wang, B. Cheng and J. Yu, *Nanotechnology*, 2021, **32**, 415402.
- S8 L. Zhou, J. Feng, B. Qiu, Y. Zhou, J. Lei, M. Xing, L. Wang, Y. Zhou, Y. Liu and J. Zhang, *App. Catal. B: Environ.*, 2020, **267**, 118396.
- S9 Y. Yang, B. Cheng, J. Yu, L. Wang and W. Ho, *Nano Res.*, 2023, **16**, 4506-4514.
- S10 X. Zhang, D. Gao, B. Zhu, B. Cheng, J. Yu and H. Yu, *Nat. Commun.*, 2024, **15**, 3212.
- S11 Y. Wang, Y. Wang, J. Zhao, M. Chen, X. Huang and Y. Xu, *App. Catal. B: Environ.*, 2021, **284**, 119691.
- S12 Z. Wei, M. Liu, Z. Zhang, W. Yao, H. Tan and Y. Zhu, *Energy Environ. Sci.*, 2018, **11**, 2581-2589.
- S13 J. Luo, Y. Liu, C. Fan, L. Tang, S. Yang, M. Liu, M. Wang, C. Feng, X. Ouyang, L. Wang, L. Xu, J. Wang and M. Yan, *ACS Catal.*, 2021, **11**, 11440-11450.
- S14 W. Liu, C. Song, M. Kou, Y. Wang, Y. Deng, T. Shimada and L. Ye, *Chem. Eng. J.*, 2021, **425**, 130615.
- S15 F. Yang, C. Feng, S. Zuo, Q. Wang, F. Wei, M. Hu, Y. Ren, D. Liu, W.-L. Li, S. Wang, H. S. Alqahtani, Y. H. Ng and H. Zhang, *J. Am. Chem. Soc.*, 2025, **147**, 17112-17120.
- S16 M. Hao, X. Deng, L. Xu and Z. Li, *App. Catal. B: Environ.*, 2019, **252**, 18-23.
- S17 Y. Chen, M.-Y. Qi and Z.-R. Tang, *Mol. Catal.*, 2024, **561**, 114178.
- S18 X. Yin, B. Lv, Y. Kang, X. Xu, X. Lei, L. Li, H. Wang, H. Xi, J. Yang and Z. Yang, *Catal. Lett.*, 2023, **153**, 570-583.
- S19 H. Zhang, K. Yu, Z. Wu and Y. Zhu, *EcoMat*, 2022, **4**, e12215.
- S20 Y. Chen, S.-N. Sun, X.-H. Chen, M.-L. Chen, J.-M. Lin, Q. Niu, S.-L. Li, J. Liu and Y.-Q. Lan, *Adv. Mater.*, 2025, **37**, 2413638.
- S21 T. Yang, F. Kong, Y. Chen, A. Kong, X. Cui and J. Shi, *Angew. Chem. Int. Ed.*, 2025, **64**, e202424110.
- S22 Z. Tian, C. Han, Y. Zhao, W. Dai, X. Lian, Y. Wang, Y. Zheng, Y. Shi, X. Pan, Z. Huang, H. Li and W. Chen, *Nat. Commun.*, 2021, **12**, 2039.
- S23 Z. Zheng, F. Han, B. Xing, X. Han and B. Li, *J. Colloid Interface Sci.*, 2022, **624**, 460-470.
- S24 X. Zhou, K. Cao, S. Huang, H. Wu, Z. Cao, H. Liu, P. Chen, D. Su, G. Wang, T. Wang, C. Wang and H. Pang, *Angew. Chem. Int. Ed.*, 2025, e202505532.
- S25 X. Chen, Y. Kuwahara, K. Mori, C. Louis and H. Yamashita, *ACS Appl. Energy Mater.*, 2021, **4**, 4823-4830.
- S26 B. He, Z. Wang, P. Xiao, T. Chen, J. Yu and L. Zhang, *Adv. Mater.*, 2022, **34**, 2203225.
- S27 W. Wang, W. Gao, X. Nie, W. Liu, X. Cheng, N. Shang, S. Gao and C. Wang, *J. Colloid Interface Sci.*, 2022, **616**, 1-11.
- S28 Z. Sun, X. Yang, X.-F. Yu, L. Xia, Y. Peng, Z. Li, Y. Zhang, J. Cheng, K. Zhang and J. Yu, *App. Catal. B: Environ.*, 2021, **285**, 119790.
- S29 Y. Shiraishi, S. Kanazawa, D. Tsukamoto, A. Shiro, Y. Sugano and T. Hirai, *ACS Catal.*, 2013, **3**, 2222-2227.

S30 Y. Shiraishi, S. Kanazawa, Y. Sugano, D. Tsukamoto, H. Sakamoto, S. Ichikawa and T. Hirai, *ACS Catal.*, 2014, **4**, 774-780.
